# Supplementary material for: Impact of 10-Min Daily Yoga Exercises on Physical and Mental Discomfort of Home-Office Workers During COVID-19
Source: PubMed Central journal article supplement — Hum Factors. 2021 Oct 1;65(7):1525–41. doi: 10.1177/00187208211045766 (PMC11107138; doi:10.1177/00187208211045766), 2021-10-01
Supplement: sj-pdf-1-hfs-10.1177_00187208211045766.pdf [file sj-pdf-1-hfs-10.1177_00187208211045766.pdf]

**EVALUACIÓN FINAL**

Seleccione cada parte del cuerpo en la cuál ha presentado un síntoma (dolor/malestar). Si usted no ha experimentado ningún síntoma no es necesario marcar nada. Por favor llene la siguiente encuesta en base a su salud durante la última semana de trabajo.

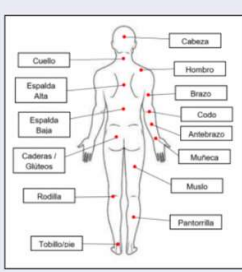

|                             | FRECUENCIA: Durante la última semana de trabajo, con qué frecuencia experimenta dolor/malestar en? | SEVERIDAD: Si usted experimentó dolor/malestar, que tan molesto era? | PRODUCTIVIDAD: Si usted experimentó dolor/malestar, cuánto este malestar pudo interferir con su capacidad para trabajar? |
|-----------------------------|----------------------------------------------------------------------------------------------------|----------------------------------------------------------------------|--------------------------------------------------------------------------------------------------------------------------|
| Fatiga Visual Ojo Derecho   | 3-4 veces la semana pasada                                                                         | -- Seleccione --                                                     | -- Seleccione --                                                                                                         |
| Fatiga Visual Ojo Izquierdo | -- Seleccione --                                                                                   | -- Seleccione --                                                     | -- Seleccione --                                                                                                         |
| Dolor Cabeza                | -- Seleccione --                                                                                   | -- Seleccione --                                                     | -- Seleccione --                                                                                                         |
| Cuello                      | -- Seleccione --                                                                                   | Muy Incómodo                                                         | -- Seleccione --                                                                                                         |
| Hombro Derecho              | 1-2 veces la semana pasada                                                                         | -- Seleccione --                                                     | Interfirió Contundentemente                                                                                              |
| Hombro Izquierdo            | -- Seleccione --                                                                                   | Moderadamente Incómodo                                               | -- Seleccione --                                                                                                         |
| Espalda Alta                | -- Seleccione --                                                                                   | -- Seleccione --                                                     | -- Seleccione --                                                                                                         |
| Espalda Baja                | -- Seleccione --                                                                                   | -- Seleccione --                                                     | -- Seleccione --                                                                                                         |
| Brazo Derecho               | -- Seleccione --                                                                                   | -- Seleccione --                                                     | -- Seleccione --                                                                                                         |
| Brazo Izquierdo             | -- Seleccione --                                                                                   | -- Seleccione --                                                     | -- Seleccione --                                                                                                         |
| Codo Derecho                | -- Seleccione --                                                                                   | -- Seleccione --                                                     | -- Seleccione --                                                                                                         |
| Codo Izquierdo              | -- Seleccione --                                                                                   | -- Seleccione --                                                     | -- Seleccione --                                                                                                         |
| Antebrazo Derecho           | -- Seleccione --                                                                                   | -- Seleccione --                                                     | -- Seleccione --                                                                                                         |
| Antebrazo Izquierdo         | -- Seleccione --                                                                                   | -- Seleccione --                                                     | -- Seleccione --                                                                                                         |
| Muñeca Derecho              | -- Seleccione --                                                                                   | -- Seleccione --                                                     | -- Seleccione --                                                                                                         |
| Muñeca Izquierdo            | -- Seleccione --                                                                                   | -- Seleccione --                                                     | -- Seleccione --                                                                                                         |
| Cadera Glúteos              | -- Seleccione --                                                                                   | -- Seleccione --                                                     | -- Seleccione --                                                                                                         |
| Muslo Derecho               | -- Seleccione --                                                                                   | -- Seleccione --                                                     | -- Seleccione --                                                                                                         |
| Cadera Glúteos              | -- Seleccione --                                                                                   | -- Seleccione --                                                     | -- Seleccione --                                                                                                         |
| Muslo Derecho               | -- Seleccione --                                                                                   | -- Seleccione --                                                     | -- Seleccione --                                                                                                         |
| Muslo Izquierdo             | -- Seleccione --                                                                                   | -- Seleccione --                                                     | -- Seleccione --                                                                                                         |
| Rodilla Derecho             | -- Seleccione --                                                                                   | -- Seleccione --                                                     | -- Seleccione --                                                                                                         |
| Rodilla Izquierdo           | -- Seleccione --                                                                                   | -- Seleccione --                                                     | -- Seleccione --                                                                                                         |
| Pantorrilla Derecho         | -- Seleccione --                                                                                   | -- Seleccione --                                                     | -- Seleccione --                                                                                                         |
| Pantorrilla Izquierdo       | -- Seleccione --                                                                                   | -- Seleccione --                                                     | -- Seleccione --                                                                                                         |
| Tobillo Pie Derecho         | -- Seleccione --                                                                                   | -- Seleccione --                                                     | -- Seleccione --                                                                                                         |
| Tobillo Pie Izquierdo       | -- Seleccione --                                                                                   | -- Seleccione --                                                     | -- Seleccione --                                                                                                         |
